# Supplementary material
Source: publisher figshare collection journal article supplement (https://acs.figshare.com/ndownloader/files/8000260)
Supplement: Supplementary file 1 [file 8000260]

#######################################################################
#
#                 Cambridge Crystallographic Data Centre
#                                CCDC 
#
#######################################################################
#
# If this CIF has been generated from an entry in the Cambridge 
# Structural Database, then it will include bibliographic, chemical, 
# crystal, experimental, refinement or atomic coordinate data resulting 
# from the CCDC's data processing and validation procedures.
#
#######################################################################

data_01909GiuliaLavarda
_symmetry_cell_setting           orthorhombic
_symmetry_space_group_name_H-M   'P 21 21 21'
_symmetry_Int_Tables_number      19
_space_group_name_Hall           'P 2ac 2ab'
loop_
_symmetry_equiv_pos_site_id
_symmetry_equiv_pos_as_xyz
1 x,y,z
2 1/2-x,-y,1/2+z
3 -x,1/2+y,1/2-z
4 1/2+x,1/2-y,-z
_cell_length_a                   11.3269(3)
_cell_length_b                   14.3193(3)
_cell_length_c                   41.3817(12)
_cell_angle_alpha                90
_cell_angle_beta                 90
_cell_angle_gamma                90
_cell_volume                     6711.83
loop_
_atom_site_label
_atom_site_type_symbol
_atom_site_fract_x
_atom_site_fract_y
_atom_site_fract_z
B1 B 0.6437(3) 0.7220(2) 0.30793(9)
C1 C 0.7906(3) 0.59627(18) 0.32026(8)
C2 C 0.8225(3) 0.54139(19) 0.34862(8)
C3 C 0.9117(3) 0.4761(2) 0.35359(8)
H3 H 0.9615 0.4563 0.3364
C4 C 0.9247(3) 0.4413(2) 0.38460(9)
H4 H 0.9838 0.3956 0.3886
C5 C 0.8543(3) 0.4711(2) 0.41001(9)
H5 H 0.8661 0.4453 0.4309
C6 C 0.7670(3) 0.5378(2) 0.40549(8)
H6 H 0.7199 0.559 0.423
C7 C 0.7506(3) 0.5728(2) 0.37443(8)
C8 C 0.6764(3) 0.6472(2) 0.36221(8)
C9 C 0.6010(3) 0.7959(2) 0.36166(8)
C10 C 0.5769(3) 0.8900(2) 0.37265(8)
C11 C 0.5341(3) 0.9255(2) 0.40186(9)
H11 H 0.5187 0.8855 0.4197
C12 C 0.5149(4) 1.0204(3) 0.40402(11)
H12 H 0.4827 1.0457 0.4233
C13 C 0.5421(3) 1.0804(3) 0.37827(11)
H13 H 0.5278 1.1454 0.3806
C14 C 0.5891(3) 1.0475(2) 0.34969(10)
H14 H 0.6103 1.0889 0.3327
C15 C 0.6043(3) 0.9510(2) 0.34664(9)
C16 C 0.6447(3) 0.8939(2) 0.31993(8)
C17 C 0.7632(3) 0.8430(2) 0.27852(8)
C18 C 0.8666(3) 0.8418(2) 0.25812(8)
C19 C 0.9339(3) 0.9139(2) 0.24464(9)
H19 H 0.9068 0.9767 0.2452
C20 C 1.0404(3) 0.8914(2) 0.23061(9)
H20 H 1.0881 0.9395 0.2217
C21 C 1.0793(3) 0.7995(2) 0.22926(9)
H21 H 1.1522 0.7861 0.2189
C22 C 1.0154(3) 0.7268(2) 0.24257(8)
H22 H 1.0433 0.6642 0.2417
C23 C 0.9091(3) 0.7488(2) 0.25726(8)
C24 C 0.8323(3) 0.6934(2) 0.27789(7)
C25 C 0.5225(3) 0.69611(19) 0.28814(7)
C26 C 0.4445(3) 0.62911(19) 0.29564(8)
C27 C 0.4960(3) 0.75855(19) 0.26028(7)
C28 C 0.4187(3) 0.8309(2) 0.26604(8)
C29 C 0.3652(3) 0.8437(2) 0.29716(9)
C30 C 0.3820(3) 0.8978(2) 0.24248(9)
C33 C 0.5583(3) 0.7405(2) 0.23053(8)
C34 C 0.5798(3) 0.8088(2) 0.20688(9)
H34 H 0.5523 0.8706 0.2104
C35 C 0.6387(4) 0.7890(2) 0.17896(9)
H35 H 0.6524 0.8375 0.1638
C36 C 0.6796(3) 0.6982(2) 0.17224(8)
C37 C 0.6612(3) 0.6299(2) 0.19623(9)
H37 H 0.6892 0.5681 0.1929
C38 C 0.6035(3) 0.6516(2) 0.22440(8)
H38 H 0.594 0.6043 0.2403
C39 C 0.7610(5) 0.7502(4) 0.12049(11)
H39A H 0.8164 0.795 0.13
H39B H 0.6883 0.7827 0.1143
H39C H 0.7967 0.7218 0.1013
C40 C 0.7760(5) 0.5841(3) 0.13707(12)
H40A H 0.715 0.5385 0.1428
H40B H 0.8475 0.5718 0.1497
H40C H 0.7943 0.5789 0.114
N1 N 0.6959(2) 0.64935(15) 0.32939(6)
N2 N 0.6208(2) 0.71613(17) 0.37797(6)
N3 N 0.6258(2) 0.80389(16) 0.32952(6)
N4 N 0.7085(2) 0.91442(16) 0.29343(7)
N5 N 0.7422(2) 0.75163(16) 0.28632(6)
N6 N 0.8532(2) 0.61265(16) 0.29329(6)
N7 N 0.4562(3) 0.5151(2) 0.34387(8)
N8 N 0.2523(4) 0.6041(3) 0.26400(11)
N9 N 0.3222(3) 0.8550(2) 0.32189(9)
N10 N 0.3508(3) 0.9519(2) 0.22404(8)
N11 N 0.7335(3) 0.6777(2) 0.14405(8)
C31 C 0.4568(3) 0.5664(2) 0.32285(9)
C32 C 0.3373(4) 0.6151(2) 0.27757(10)
B2 B 0.8715(3) 0.0420(2) 0.44570(9)
C41 C 0.8900(3) -0.1152(2) 0.41944(8)
C42 C 0.9323(3) -0.1490(2) 0.38848(8)
C43 C 0.9484(3) -0.2385(2) 0.37627(9)
H43 H 0.9301 -0.2921 0.3888
C44 C 0.9921(3) -0.2466(2) 0.34519(10)
H44 H 1.0061 -0.307 0.3366
C45 C 1.0158(3) -0.1692(3) 0.32632(9)
H45 H 1.0477 -0.1778 0.3053
C46 C 0.9945(3) -0.0797(2) 0.33726(9)
H46 H 1.0061 -0.027 0.3237
C47 C 0.9553(3) -0.0699(2) 0.36884(8)
C48 C 0.9267(3) 0.0123(2) 0.38789(8)
C49 C 0.8383(3) 0.15221(19) 0.39931(8)
C50 C 0.7590(3) 0.22914(19) 0.39281(8)
C51 C 0.7375(3) 0.2793(2) 0.36452(8)
H51 H 0.7847 0.2703 0.3458
C52 C 0.6453(3) 0.3427(2) 0.36457(8)
H52 H 0.629 0.3776 0.3456
C53 C 0.5757(3) 0.3564(2) 0.39206(8)
H53 H 0.5147 0.402 0.3916
C54 C 0.5939(3) 0.3048(2) 0.41995(8)
H54 H 0.545 0.3132 0.4384
C55 C 0.6855(3) 0.24049(19) 0.42024(8)
C56 C 0.7169(3) 0.16721(19) 0.44295(8)
C57 C 0.6766(3) 0.0380(2) 0.47398(8)
C58 C 0.6052(3) -0.0347(2) 0.48894(8)
C59 C 0.4996(4) -0.0315(3) 0.50581(10)
H59 H 0.462 0.0263 0.5105
C60 C 0.4509(4) -0.1153(3) 0.51561(12)
H60 H 0.3794 -0.1148 0.5276
C61 C 0.5040(5) -0.2007(3) 0.50840(12)
H61 H 0.4679 -0.2567 0.5157
C62 C 0.6072(4) -0.2056(2) 0.49100(10)
H62 H 0.6416 -0.2641 0.4856
C63 C 0.6594(3) -0.1216(2) 0.48160(8)
C64 C 0.7630(3) -0.1024(2) 0.46223(8)
C65 C 0.9771(3) 0.06670(19) 0.47191(8)
C66 C 1.0909(3) 0.0413(2) 0.47086(8)
C67 C 1.1435(3) -0.0145(2) 0.44562(9)
C68 C 1.1699(3) 0.0633(3) 0.49720(9)
C69 C 0.9311(3) 0.1169(2) 0.50120(7)
C70 C 0.9297(3) 0.21258(19) 0.49991(8)
C71 C 0.9796(3) 0.2598(2) 0.47244(9)
C72 C 0.8847(3) 0.2721(2) 0.52474(8)
C73 C 0.8864(3) 0.0576(2) 0.52707(8)
C74 C 0.7991(3) 0.0861(2) 0.54889(8)
H74 H 0.7667 0.147 0.547
C75 C 0.7595(3) 0.0281(2) 0.57283(8)
H75 H 0.6993 0.0495 0.587
C76 C 0.8057(3) -0.0629(2) 0.57710(8)
C77 C 0.8907(3) -0.0925(2) 0.55458(8)
H77 H 0.9226 -0.1537 0.5562
C78 C 0.9281(3) -0.0348(2) 0.53046(9)
H78 H 0.9843 -0.0577 0.5154
C79 C 0.6904(4) -0.0835(3) 0.62612(10)
H79A H 0.6098 -0.0811 0.6176
H79B H 0.7152 -0.0206 0.6326
H79C H 0.6927 -0.125 0.6449
C80 C 0.8045(4) -0.2168(3) 0.60291(12)
H80A H 0.8908 -0.221 0.604
H80B H 0.7762 -0.2491 0.5835
H80C H 0.7702 -0.246 0.6222
N12 N 0.9037(2) -0.01990(16) 0.41835(6)
N13 N 0.9013(2) 0.09985(17) 0.37869(6)
N14 N 0.8162(2) 0.12555(16) 0.43056(6)
N15 N 0.6519(2) 0.12772(16) 0.46654(6)
N16 N 0.7721(2) -0.00735(16) 0.46164(6)
N17 N 0.8271(2) -0.15747(17) 0.44263(7)
N18 N 1.1891(3) -0.0611(2) 0.42696(9)
N19 N 1.2304(3) 0.0779(3) 0.51850(9)
N20 N 1.0199(3) 0.2966(2) 0.45050(8)
N21 N 0.8480(3) 0.3215(2) 0.54422(8)
N22 N 0.7692(3) -0.1184(2) 0.60153(8)
O1 O 0.1642(10) 0.6068(7) 0.1925(2)

#END
